# Supplementary material for: Clinicoprognostic and Histopathological Features of Guttate and Plaque Psoriasis Based on PD-1 Expression
Source: J Clin Med. 2021 Nov 7;10(21):5200. doi: 10.3390/jcm10215200 (PMC8584888; doi:10.3390/jcm10215200)
Supplement: Supplementary file 1 [file jcm-10-05200-s001.zip › jcm-1372407-supplementary.pdf]

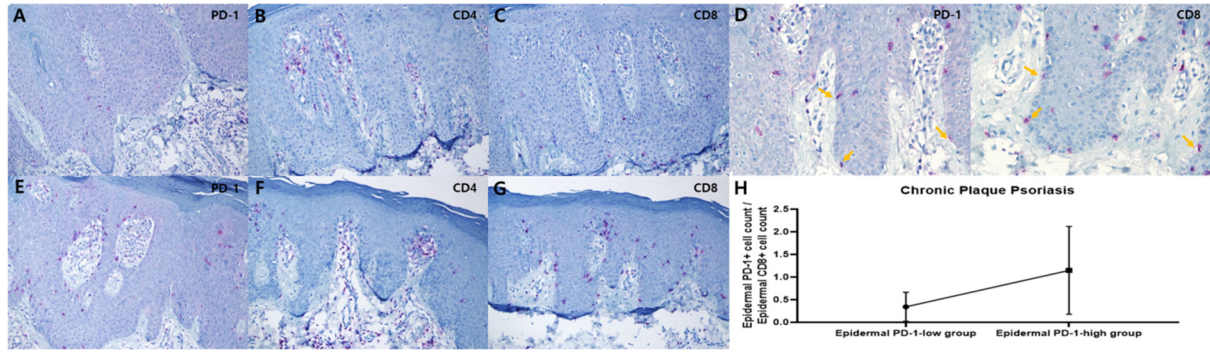

**Figure S1.** The T cell landscape in representative patients with chronic plaque psoriasis (CPP). (A) A patient with CPP of epidermal PD-1-high group showed high epidermal PD-1 expression with some dermal PD-1 expression (magnification X100). (B) IHC staining for CD4 was mainly positive for dermal T cells (magnification X100). (C) CD8 was mainly positive for epidermal T cells (magnification X100). (D) Epidermal PD-1 positive cells seemed to be positive for CD8 in IHC of nearby sections as indicated by arrows (magnification X400). (E) Another patient with CPP of epidermal PD-1-high group showed high epidermal PD-1 expression with low dermal PD-1 expression (magnification X100). (F) The majority of T cells in dermis were positive for CD4 (magnification X100). (G) The majority of T cells in epidermis were positive for CD8 (magnification X100). (H) To normalize epidermal PD-1 positive cells, each number of epidermal PD-1 positive cells was divided by the number of epidermal CD8 positive cells. Epidermal high-PD-1 group tended to show higher number of epidermal PD-1 positive cells to number of epidermal CD8 positive cells, compared with epidermal low-PD-1 group.

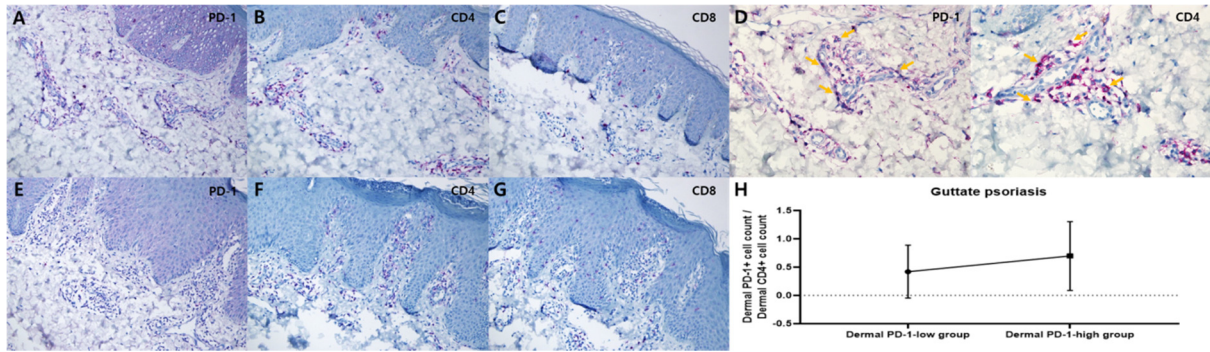

**Figure S2.** The T cell landscape in representative patients with guttate psoriasis (GP). (A) A patient with GP of dermal PD-1-high group showed high dermal PD-1 expression with some epidermal PD-1 expression (magnification X100). (B) The majority of T cells in dermis were positive for CD4 (magnification X100). (C) The majority of T cells in epidermis were positive for CD8 which are less compared with those of CPP (magnification X100). (D) Dermal PD-1 positive cells were also positive for CD4 in IHC of nearby sections as indicated by arrows (magnification X400). (E) Another patient with GP of dermal PD-1-high group showed high dermal PD-1 expression with no epidermal PD-1 expression (magnification X100). (F) IHC staining for CD4 was mainly positive for dermal T cells (magnification X100). (G) IHC staining for CD8 was mainly positive for epidermal T cells (magnification X100). (H) To normalize dermal PD-1 positive cells, each number of dermal PD-1 positive cells was divided by the number of dermal CD4 positive cells. Dermal high-PD-1 group tended to show higher number of dermal PD-1 positive cells to number of dermal CD4 positive cells, compared with dermal low-PD-1 group..

**Table S1.** Primers used for quantitative real-time polymerase chain reaction analysis.

| Primer | Gene name     | Gene ID | Forward sequence<br>(5' to 3') | Reverse sequence<br>(5' to 3') |
|--------|---------------|---------|--------------------------------|--------------------------------|
| S100A8 | <i>S100A8</i> | 6279    | GGGATGACCTGAAGAAATTGCTA        | TGTTGATATCCAACCTCTTTGAACCA     |
| PD-L1  | <i>CD274</i>  | 29126   | TGGCATTGCTGAACGCATT            | TGCAGCCAGGTCTAATTGTTTT         |

Abbreviations: PD-1, programmed cell death protein-1; PD-L1, programmed cell death-ligand 1.

**Table S2.** Clinical characteristics of patients with chronic plaque psoriasis according to the dermal expression level of PD-1.

| Characteristics                       | Dermal PD-1-low group ( <i>n</i> = 16) | Dermal PD-1-high group ( <i>n</i> = 13) | <i>p</i> -Value |
|---------------------------------------|----------------------------------------|-----------------------------------------|-----------------|
| Sex ( <i>n</i> (%))                   |                                        |                                         |                 |
| Male                                  | 12 (75.0)                              | 9 (69.2)                                | 0.526           |
| Female                                | 4 (25.0)                               | 4 (30.8)                                |                 |
| Age (years)                           |                                        |                                         | 0.232           |
| Range                                 | 12–81                                  | 17–66                                   |                 |
| Mean ± SD                             | 43.13 ± 18.01                          | 49.54 ± 15.37                           |                 |
| Family history of psoriasis           |                                        |                                         |                 |
| Yes                                   | 1 (6.3)                                | 0 (0.0)                                 | 0.552           |
| No                                    | 15 (93.8)                              | 13 (100.0)                              |                 |
| Preceding upper respiratory infection |                                        |                                         |                 |
| Yes                                   | 0 (0.0)                                | 1 (7.7)                                 | 0.448           |
| No                                    | 16 (100.0)                             | 12 (92.3)                               |                 |
| PASI score                            |                                        |                                         | 0.537           |
| Range                                 | 1.2–41.8                               | 5.6–20.8                                |                 |
| Mean ± SD                             | 11.91 ± 10.58                          | 12.03 ± 4.86                            |                 |
| Pruritus                              |                                        |                                         |                 |
| Yes                                   | 15 (93.8)                              | 11 (84.6)                               | 0.420           |
| No                                    | 1 (6.3)                                | 2 (15.4)                                |                 |
| Disease duration (months)             |                                        |                                         | 0.101           |
| Range                                 | 6–360                                  | 1–480                                   |                 |
| Mean ± SD                             | 118.75 ± 124.89                        | 206.39 ± 140.24                         |                 |

Abbreviations: PD-1, programmed cell death protein-1; SD, standard deviation; PASI, Psoriasis Area and Severity Index.

**Table S3.** Histopathological characteristics of patients with chronic plaque psoriasis according to the dermal expression level of PD-1.

| Characteristics               | Dermal PD-1-low group ( <i>n</i> = 16) | Dermal PD-1-high group ( <i>n</i> = 13) | <i>p</i> -value |
|-------------------------------|----------------------------------------|-----------------------------------------|-----------------|
| Epidermal thickness (µm)      |                                        |                                         | 0.559           |
| Range                         | 138.81–337.170                         | 127.92–475.04                           |                 |
| Mean ± SD                     | 231.72 ± 63.86                         | 264.87 ± 105.38                         |                 |
| Horny layer thickness (µm)    |                                        |                                         | 0.056           |
| Range                         | 11.63–117.40                           | 27.16–163.65                            |                 |
| Mean ± SD                     | 42.97 ± 28.67                          | 62.36 ± 36.47                           |                 |
| Rete ridge count (n)          |                                        |                                         | 0.351           |
| Range                         | 8–15                                   | 8–15                                    |                 |
| Mean ± SD                     | 11.94 ± 2.08                           | 11.69 ± 1.70                            |                 |
| Cellular infiltration grading |                                        |                                         | 0.042*          |
| Range                         | 1–3                                    | 1–3                                     |                 |
| Mean ± SD                     | 1.63 ± 0.72                            | 2.15 ± 0.55                             |                 |
| Vessel dilatation grading     |                                        |                                         | 0.129           |
| Range                         | 1–2                                    | 2–3                                     |                 |
| Mean ± SD                     | 1.62 ± 0.50                            | 2.00 ± 0.41                             |                 |

\* Statistically significant. Abbreviations: PD-1, programmed cell death protein-1; SD, standard deviation.
